# Supplementary material for: Proteomic analysis of the cytotoxic effects induced by the organogold( iii ) complex Aubipyc in cisplatin-resistant A2780 ovarian cancer cells: further evidence for the glycolytic pathway implication
Source: Royal Society of Chemistry journal article supplement (doi:10.1039/c5mb00008d), 2015-04-15
Supplement: c5mb00008d1.pdf [file c5mb00008d1.pdf]

**Table S1** Trypan blue vital dye exclusion assay in A2780/R cells

| <b>Condition</b>                                         | <b>Time exposure (h)</b> | <b>% of cell growth inhibition respect to control* <math>\pm</math> SD</b> | <b>% Viability of adherent cells <math>\pm</math> SD</b> |
|----------------------------------------------------------|--------------------------|----------------------------------------------------------------------------|----------------------------------------------------------|
| <b>A2780/R control</b>                                   | 24                       |                                                                            | 98.0 $\pm$ 1.4                                           |
| <b>A2780/R + 10 <math>\mu</math>M Aubipy<sub>c</sub></b> | 24                       | 6.7 $\pm$ 1.8                                                              | 95.7 $\pm$ 1.5                                           |
| <b>A2780/R control</b>                                   | 48                       |                                                                            | 95.8 $\pm$ 0.8                                           |
| <b>A2780/R + 10 <math>\mu</math>M Aubipy<sub>c</sub></b> | 48                       | 37.0 $\pm$ 2.0                                                             | 90.2 $\pm$ 2.4                                           |
| <b>A2780/R control</b>                                   | 72                       |                                                                            | 94.8 $\pm$ 2.1                                           |
| <b>A2780/R + 10 <math>\mu</math>M Aubipy<sub>c</sub></b> | 72                       | 50.7 $\pm$ 4.9                                                             | 87.3 $\pm$ 2.1                                           |

\*Total number of treated cells/total number of control cells, percent SD, standard deviation
